# Supplementary material
Source: PubMed Central journal article supplement (PMC2799158)
Supplement: supp_137.2.237_DEV042754TableS1.pdf [file supp_137.2.237_DEV042754TableS1.pdf]

**Table S1. Spindle-severing experiments**

| Genotype                                | n  | A ( $\mu\text{m}/\text{sec}$ ) | P ( $\mu\text{m}/\text{sec}$ ) | Anaphase (Student's <i>t</i> -test, versus wild type) |                 |
|-----------------------------------------|----|--------------------------------|--------------------------------|-------------------------------------------------------|-----------------|
|                                         |    |                                |                                | (A)                                                   | (P)             |
| Wild-type metaphase                     | 8  | 0.65 $\pm$ 0.18                | 0.70 $\pm$ 0.08                | <i>P</i> >0.5                                         | <i>P</i> <0.001 |
| <i>pph-6(RNAi)</i> metaphase*           | 8  | 0.69 $\pm$ 0.09                | 0.79 $\pm$ 0.14                | <i>P</i> ~0.2                                         | <i>P</i> <0.001 |
| <i>goa-1(sa734)</i> metaphase*          | 8  | 0.67 $\pm$ 0.05                | 0.70 $\pm$ 0.04                | <i>P</i> >0.05                                        | <i>P</i> <0.001 |
| <i>gpa-16(RNAi)</i> metaphase*          | 14 | 0.68 $\pm$ 0.02                | 0.71 $\pm$ 0.01                | <i>P</i> >0.5                                         | <i>P</i> <0.001 |
| Wild type <sup>†</sup>                  | 9  | 0.68 $\pm$ 0.10                | 1.10 $\pm$ 0.12                |                                                       |                 |
| <i>pph-6(RNAi)</i>                      | 12 | 0.40 $\pm$ 0.09                | 0.56 $\pm$ 0.08                | <i>P</i> <0.001                                       | <i>P</i> <0.001 |
| <i>saps-1(RNAi)</i>                     | 10 | 0.39 $\pm$ 0.07                | 0.57 $\pm$ 0.07                | <i>P</i> <0.001                                       | <i>P</i> <0.001 |
| <i>goa-1(sa734)</i> <sup>‡</sup>        | 12 | 0.69 $\pm$ 0.08                | 0.73 $\pm$ 0.09                | <i>P</i> ~0.2                                         | <i>P</i> <0.001 |
| <i>gpa-16(RNAi)</i> <sup>‡</sup>        | 15 | 0.60 $\pm$ 0.07                | 0.65 $\pm$ 0.07                | <i>P</i> ~0.1                                         | <i>P</i> <0.001 |
| <i>gbp-1(RNAi)</i> <sup>‡</sup>         | 8  | 0.96 $\pm$ 0.08                | 0.97 $\pm$ 0.23                | <i>P</i> <0.001                                       | <i>P</i> <0.001 |
| <i>saps-1/gbp-1(RNAi)</i>               | 9  | 0.74 $\pm$ 0.15                | 0.92 $\pm$ 0.09                | <i>P</i> ~0.2                                         | <i>P</i> <0.001 |
| <i>csnk-1(RNAi)</i>                     | 10 | 0.92 $\pm$ 0.13                | 1.25 $\pm$ 0.18                | <i>P</i> <0.001                                       | <i>P</i> <0.001 |
| <i>saps-1/csnk-1(RNAi)</i> <sup>§</sup> | 9  | 0.49 $\pm$ 0.08                | 0.59 $\pm$ 0.07                | <i>P</i> <0.001                                       | <i>P</i> <0.001 |
| <i>ani-1(RNAi)</i>                      | 9  | 0.75 $\pm$ 0.08                | 1.00 $\pm$ 0.10                | <i>P</i> >0.2                                         | <i>P</i> >0.05  |
| Latrunculin/wild type                   | 11 | 1.14 $\pm$ 0.20                | 1.05 $\pm$ 0.17                | <i>P</i> <0.001                                       | <i>P</i> >0.2   |
| Latrunculin/ <i>saps-1(RNAi)</i>        | 14 | 0.70 $\pm$ 0.04                | 0.64 $\pm$ 0.06                | <i>P</i> <0.001                                       | <i>P</i> <0.001 |

Average peak velocities were estimated as described in the Materials and methods for the anterior (A) and posterior (P) spindle poles. Spindle-severing experiments were performed at anaphase unless otherwise indicated, or at metaphase, as indicated, before the initial spindle displacement. '±' corresponds to standard deviation.

\*The values obtained for the anterior and posterior poles are statistically similar to those of the wild type in metaphase (A, *P*>0.2; P, *P*>0.1).

<sup>†</sup>These values are statistically indistinguishable from those reported by Afshar et al. (Afshar et al., 2004; Afshar et al., 2005) (*P*>0.2).

<sup>‡</sup>From Afshar et al. (Afshar et al., 2004).

<sup>§</sup>The value for the posterior pole is statistically similar to those of *pph-6(RNAi)* and *saps-1(RNAi)* (*P*>0.2). The value for the anterior pole is at limit of being statistically different from *pph-6(RNAi)* and *saps-1(RNAi)* (*P*~0.05).
