# Supplementary material
Source: PubMed Central journal article supplement (PMC2799158)

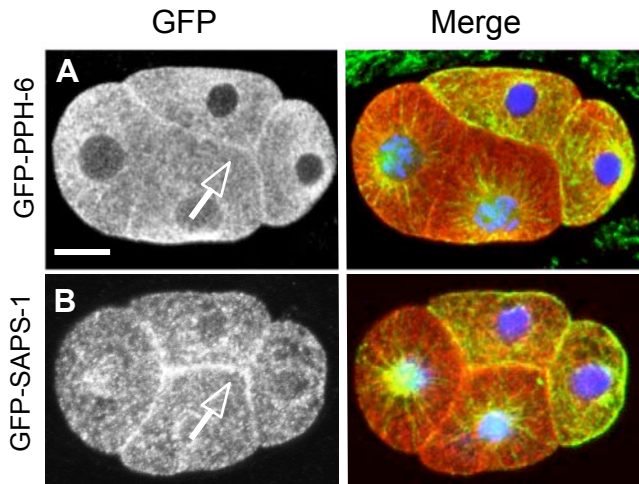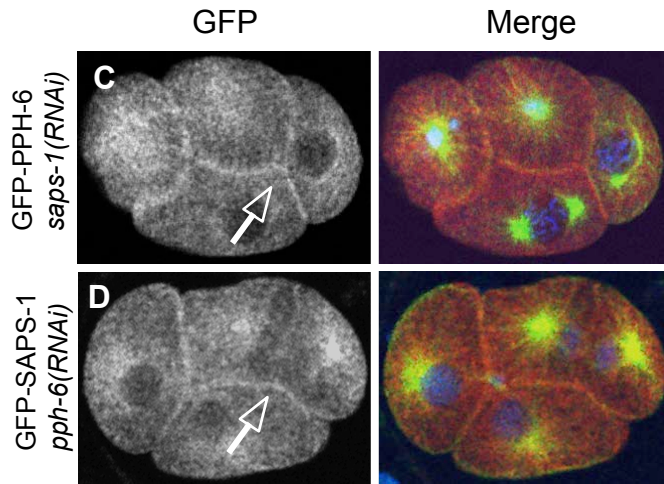

Supplement: supp_137.2.237_042754-FigS2.pdf [file supp_137.2.237_042754-FigS2.pdf]

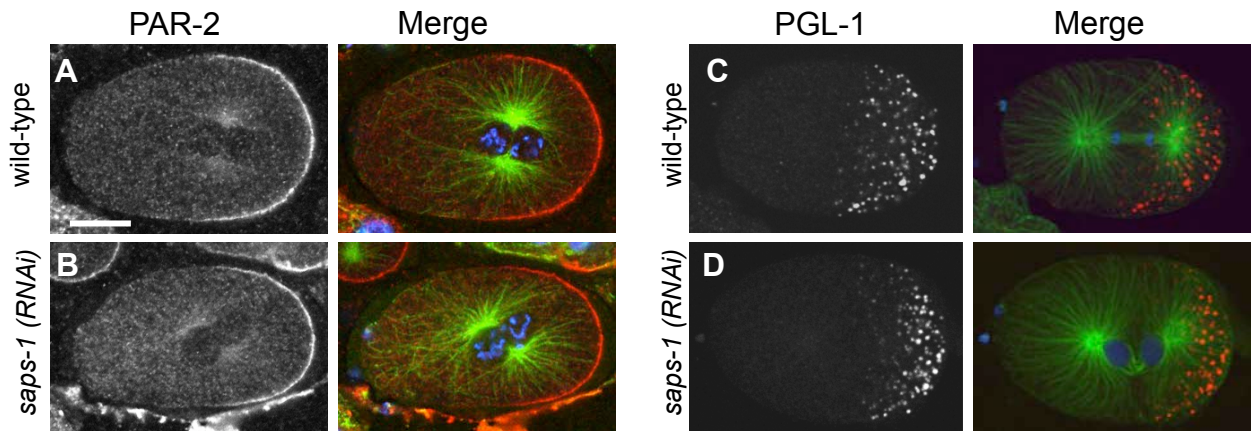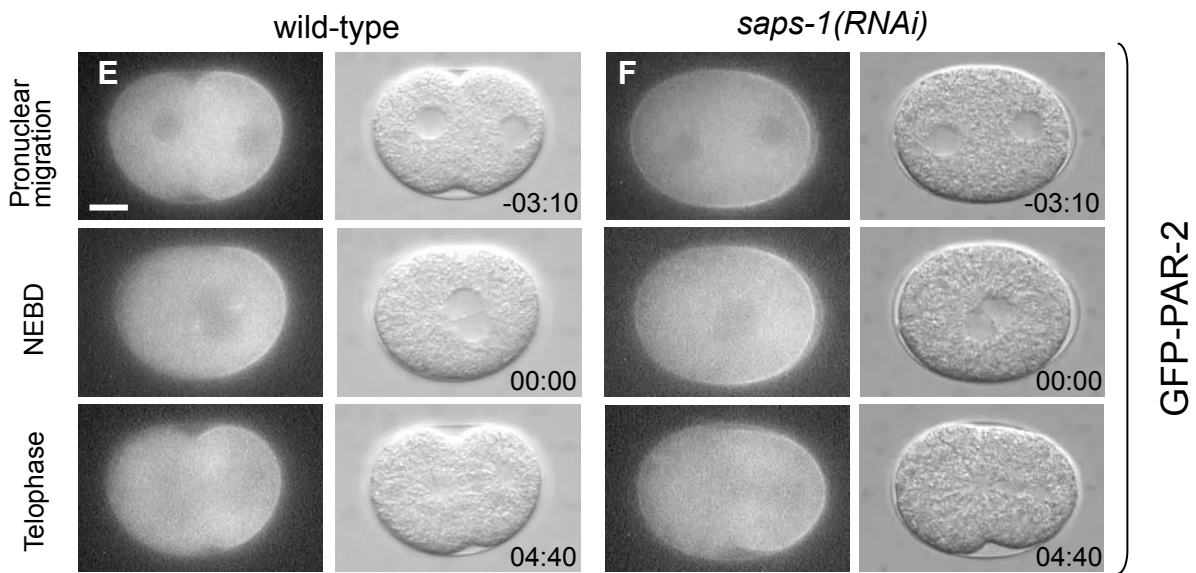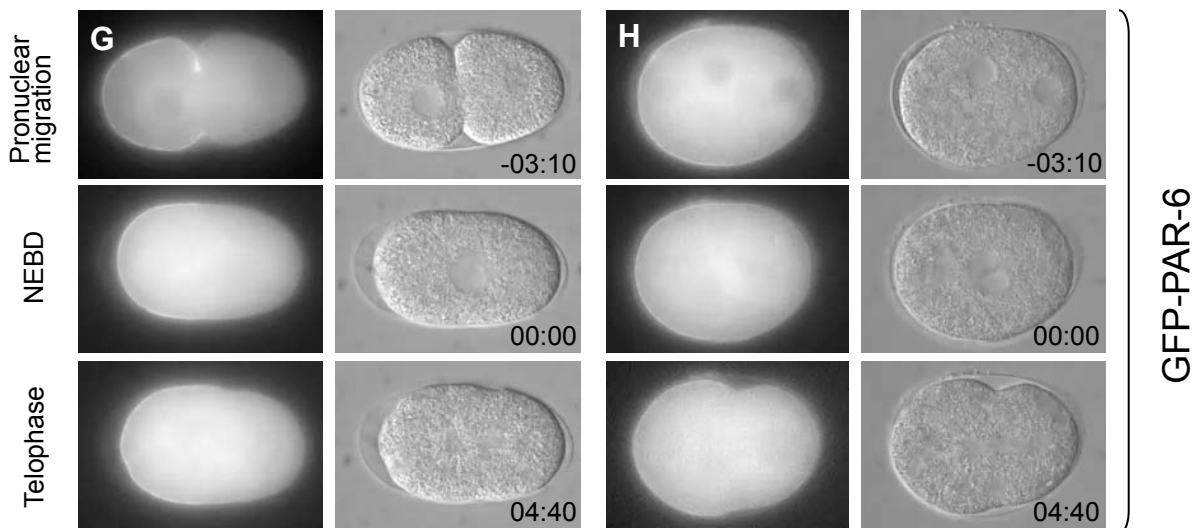

Supplement: supp_137.2.237_042754-FigS3.pdf [file supp_137.2.237_042754-FigS3.pdf]

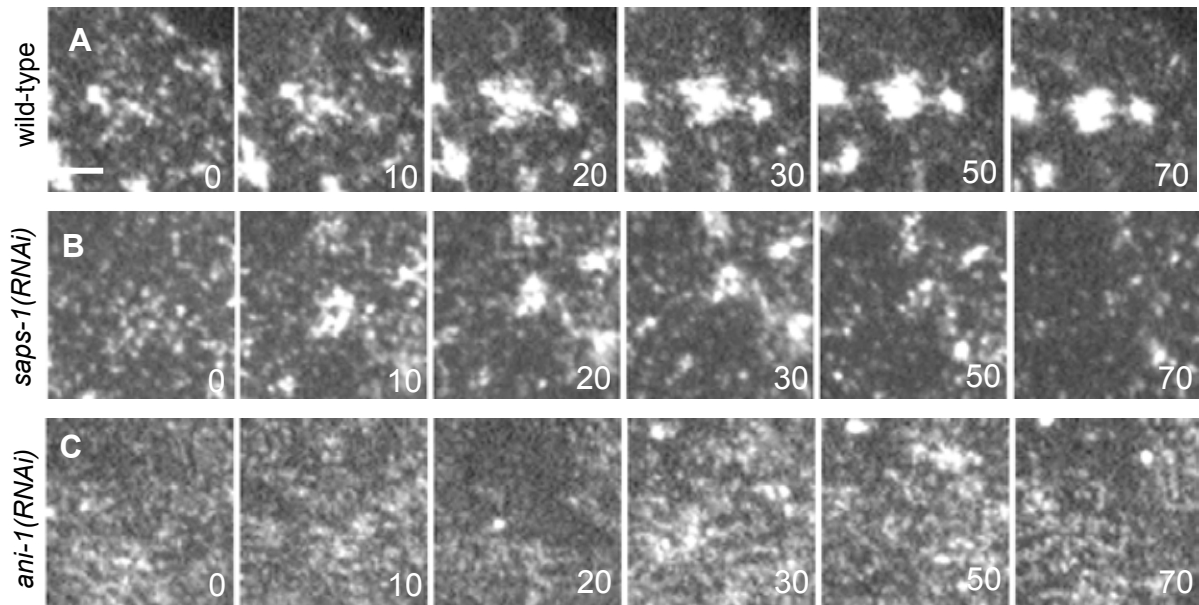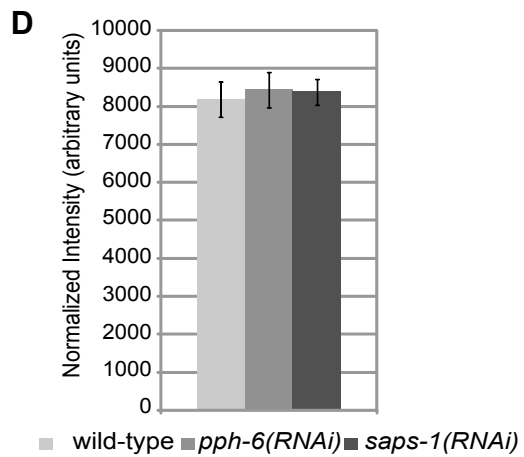

Supplement: supp_137.2.237_042754-FigS4.pdf [file supp_137.2.237_042754-FigS4.pdf]

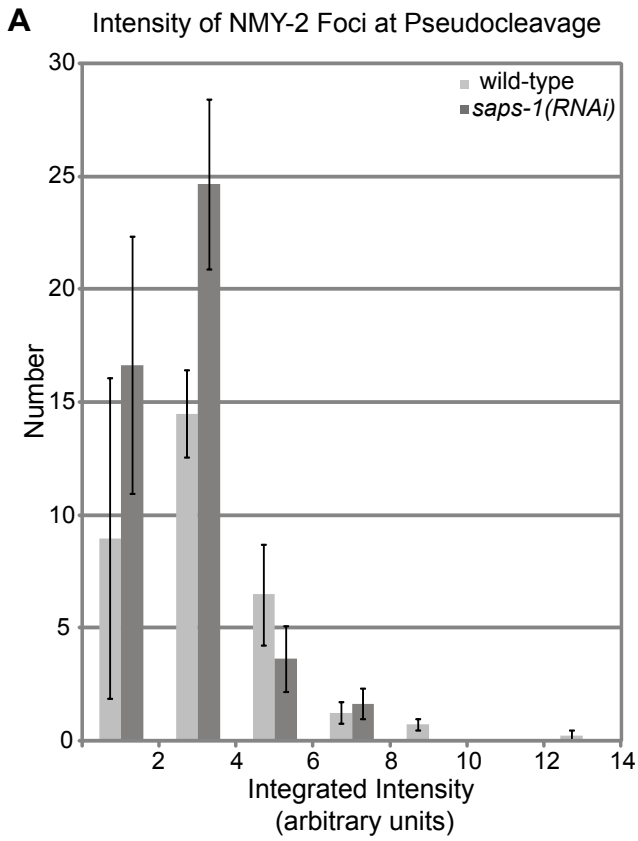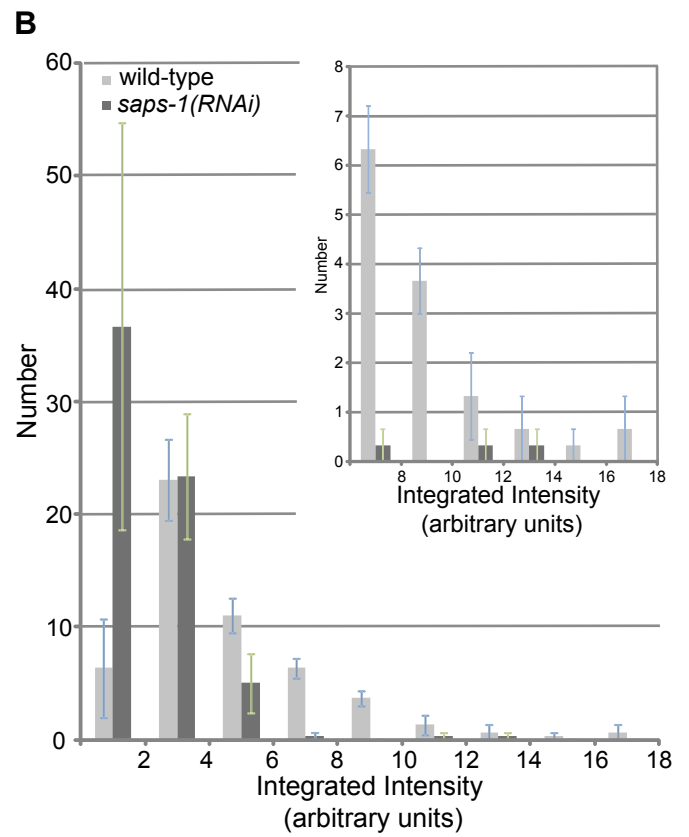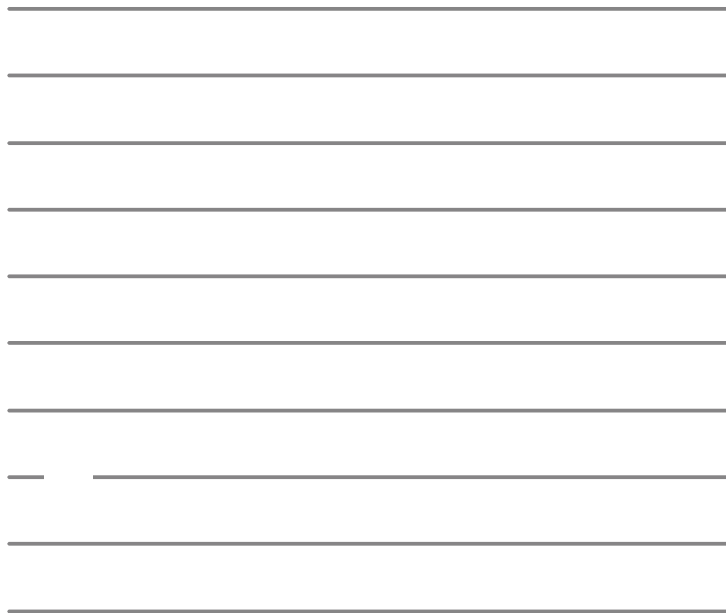

Supplement: supp_137.2.237_042754-FigS5.pdf [file supp_137.2.237_042754-FigS5.pdf]

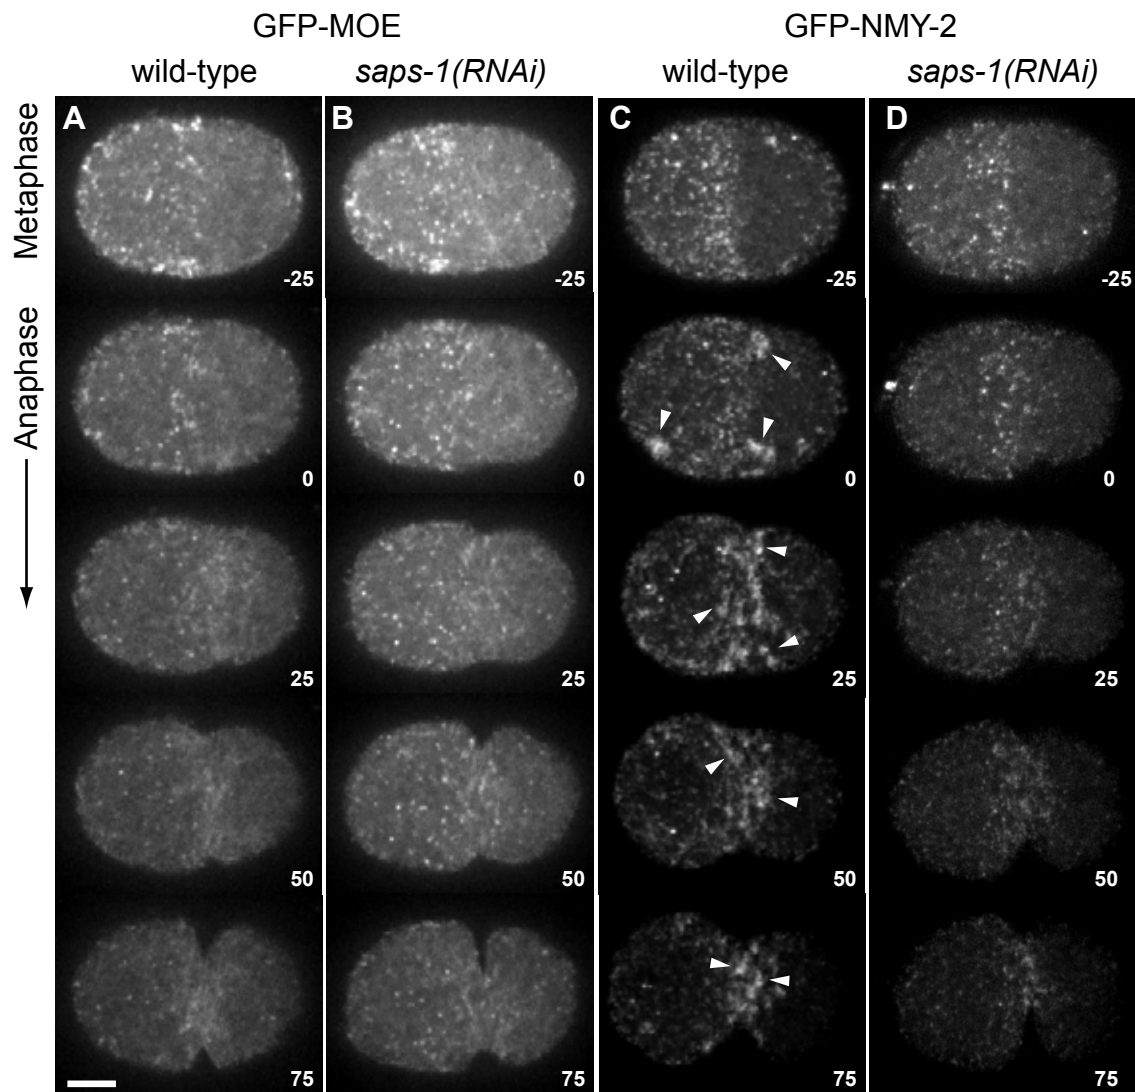

Supplement: supp_137.2.237_042754-FigS6.pdf [file supp_137.2.237_042754-FigS6.pdf]

**A**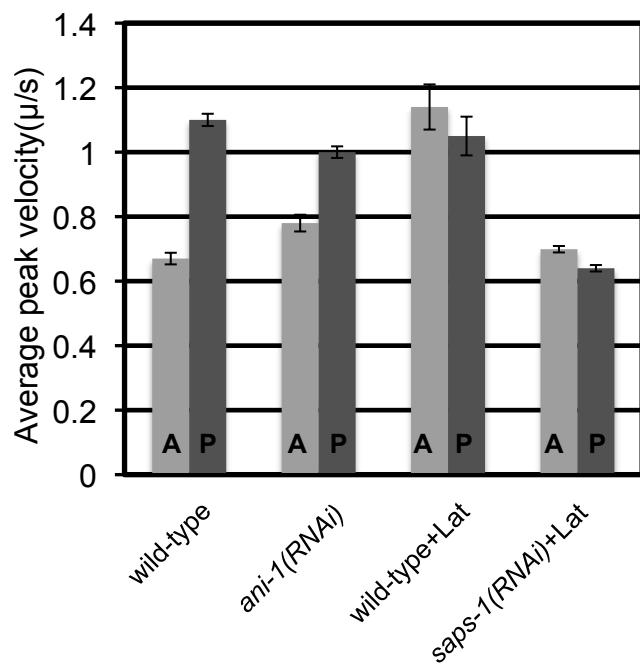**B**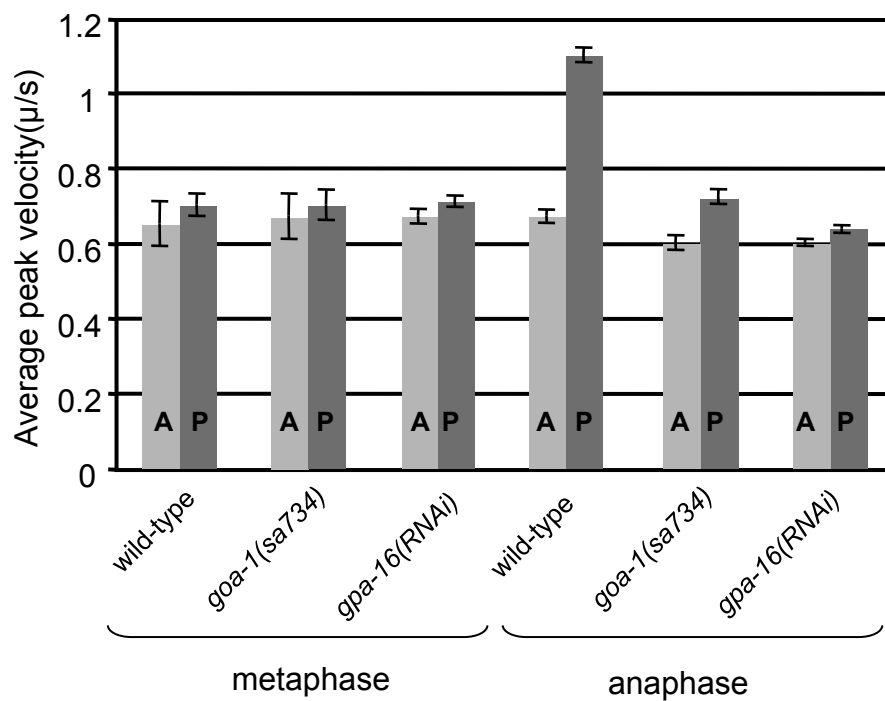

Supplement: supp_137.2.237_042754-FigS7.pdf [file supp_137.2.237_042754-FigS7.pdf]

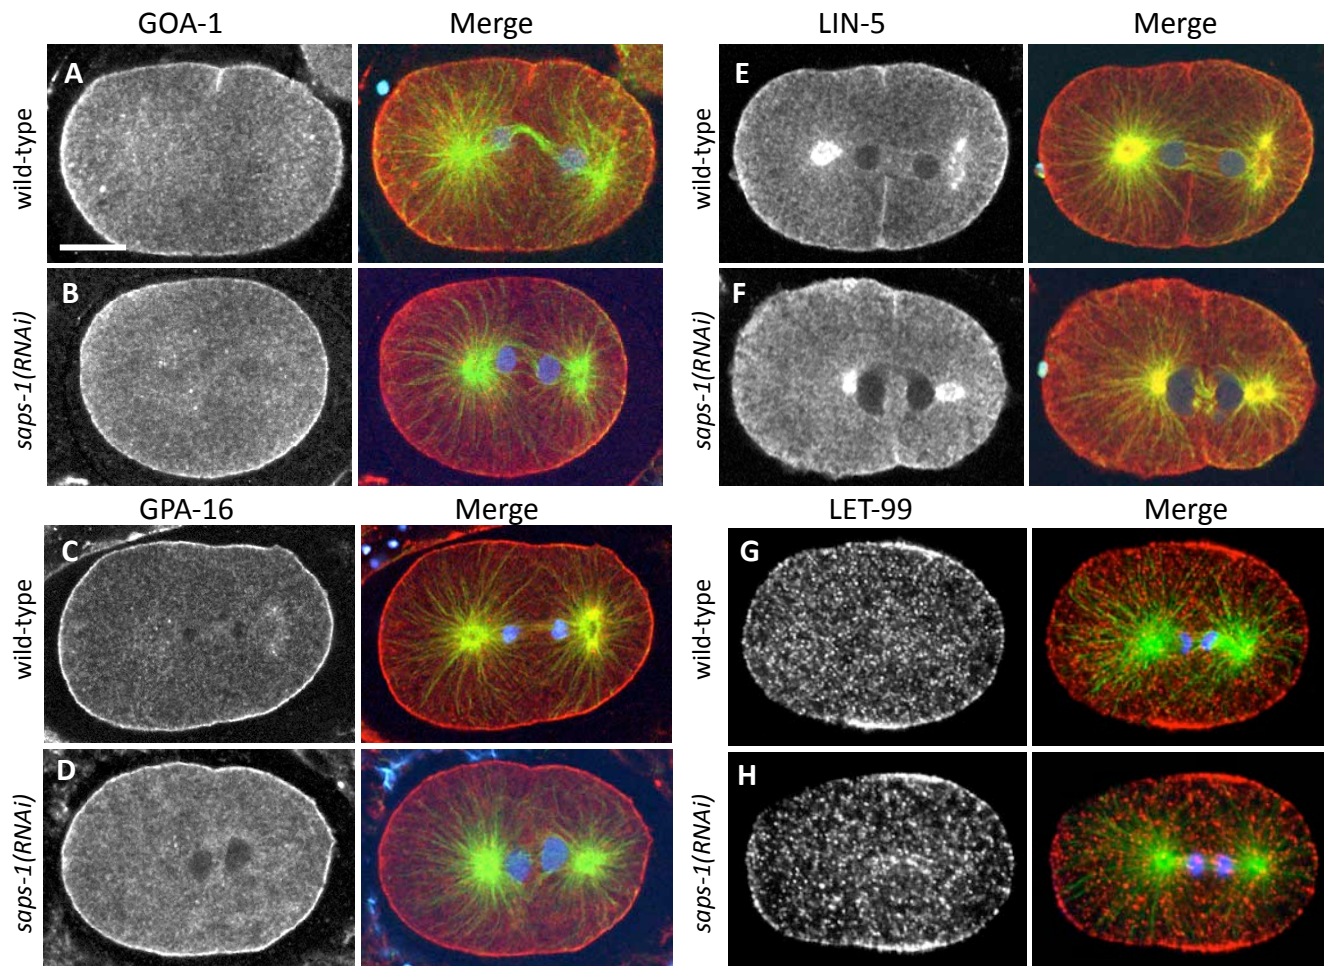

Supplement: supp_137.2.237_042754-FigS8.pdf [file supp_137.2.237_042754-FigS8.pdf]

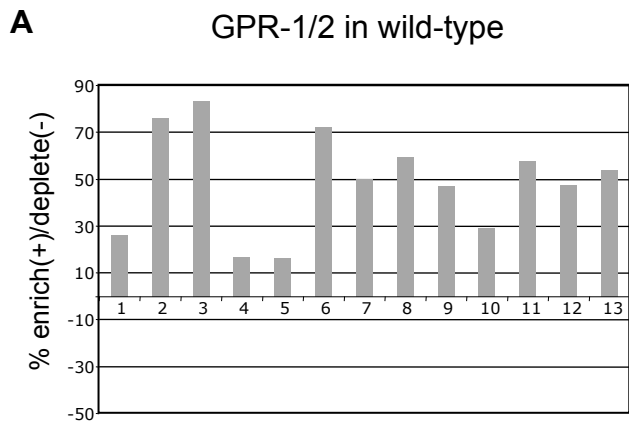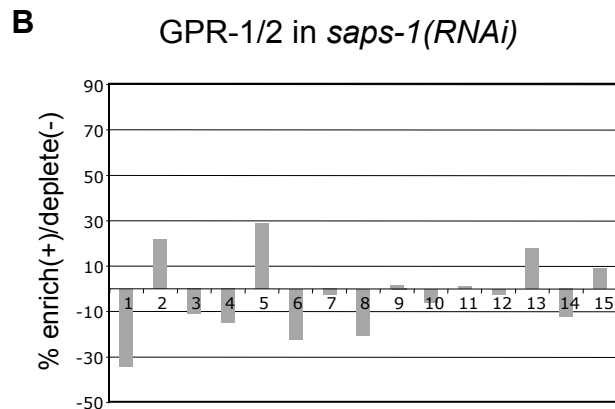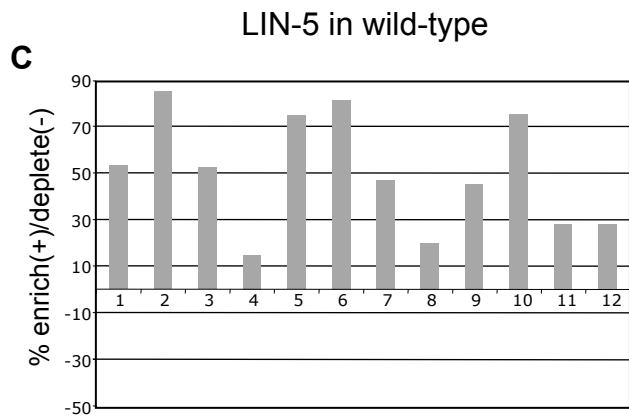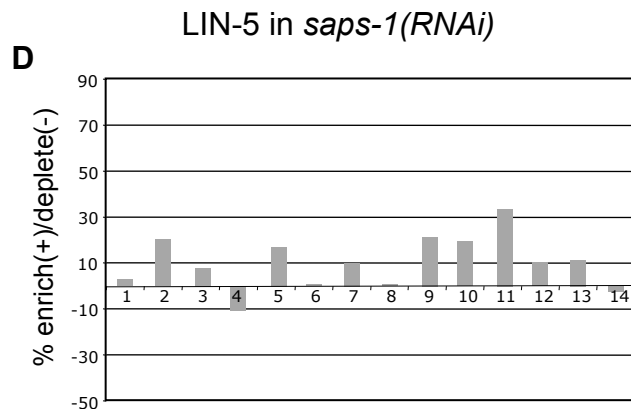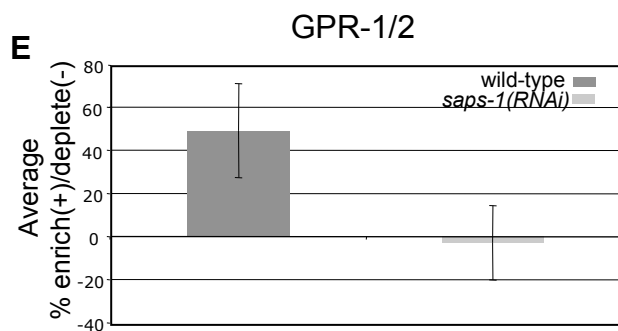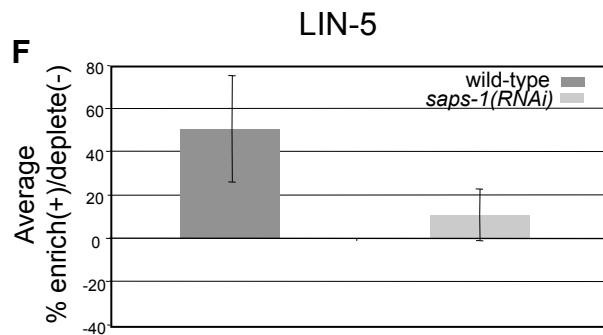

Supplement: supp_137.2.237_042754-FigS9.pdf [file supp_137.2.237_042754-FigS9.pdf]
